# Supplementary material
Source: MDPI journal article supplement (https://www.mdpi.com/2071-1050/14/19/12824)
Supplement: s1 [file s1]

**Table S1.** Geothermal temperature scale and cationic geothermal temperature scale formula of SiO<sub>2</sub> [45,55,56].

| Geothermometer                 | Calculation formula                                                                                                                                                                                                                                                                 | Scope of application(°C) | Reference |
|--------------------------------|-------------------------------------------------------------------------------------------------------------------------------------------------------------------------------------------------------------------------------------------------------------------------------------|--------------------------|-----------|
| Chalcedony(no loss of steam)   | $t = \frac{1032}{4.62 - \log \text{SiO}_2} - 273.15$                                                                                                                                                                                                                                | 100-180                  | [55]      |
| Chalcedony(maximum steam loss) | $t = \frac{1264}{5.31 - \log \text{SiO}_2} - 273.15$                                                                                                                                                                                                                                | 100-180                  |           |
| Quartz(no loss of steam)       | $t = \frac{1309}{5.19 - \log \text{SiO}_2} - 273.15$                                                                                                                                                                                                                                | 0-250                    |           |
| Quartz(maximum steam loss)     | $t = \frac{1522}{5.75 - \log \text{SiO}_2} - 273.15$                                                                                                                                                                                                                                |                          |           |
| Na-K-Ca                        | $t = \frac{1647}{\log\left(\frac{\text{Na}}{\text{K}}\right) + \left(\beta \log \frac{\sqrt{\text{Ca}}}{\text{Na}} + 2.06\right) + 2.47} - 273.15$<br>$\beta=4/3(\text{when } t < 100\text{ }^{\circ}\text{C}) \text{ or } \beta=1/3(\text{when } t > 100\text{ }^{\circ}\text{C})$ | 0-250                    | [56]      |
| Na-K                           | $t = \frac{856}{\log\left(\frac{\text{Na}}{\text{K}}\right) + 0.857} - 273.15$                                                                                                                                                                                                      | 25-250                   |           |
| K-Mg                           | $t = \frac{4410}{13.95 - \log\left(\frac{\text{K}^2}{\text{Mg}}\right)} - 273.15$                                                                                                                                                                                                   | 50-300                   | [45]      |

**Table S2.** Relationship among temperature, enthalpy and SiO<sub>2</sub> content

| T/°C | Enthalpy/(J·g <sup>-1</sup> ) | SiO <sub>2</sub> /(mg·L <sup>-1</sup> ) | T/°C | Enthalpy/(J·g <sup>-1</sup> ) | SiO <sub>2</sub> /(mg·L <sup>-1</sup> ) | T/°C | Enthalpy/(J·g <sup>-1</sup> ) | SiO <sub>2</sub> /(mg·L <sup>-1</sup> ) |
|------|-------------------------------|-----------------------------------------|------|-------------------------------|-----------------------------------------|------|-------------------------------|-----------------------------------------|
| 50   | 50                            | 13.5                                    | 150  | 151.0                         | 125.0                                   | 250  | 259.2                         | 486.0                                   |
| 75   | 75                            | 26.6                                    | 175  | 177.0                         | 185.0                                   | 275  | 589.0                         | 614.0                                   |
| 100  | 100.1                         | 48.0                                    | 200  | 203.6                         | 265.0                                   | 300  | 321.0                         | 692.0                                   |
| 125  | 125.1                         | 80.0                                    | 225  | 230.9                         | 365.0                                   | -    | -                             | -                                       |
